# Supplementary material
Source: PubMed Central journal article supplement (PMC9724670)
Supplement: EMBR-23-e55478-s004.pdf [file EMBR-23-e55478-s004.pdf]

## **Appendix**

### **Table of contents**

|                                  | <b><u>Page</u></b> |
|----------------------------------|--------------------|
| <b><u>Appendix Figure S1</u></b> | <b><u>2</u></b>    |

## Appendix Figure S1

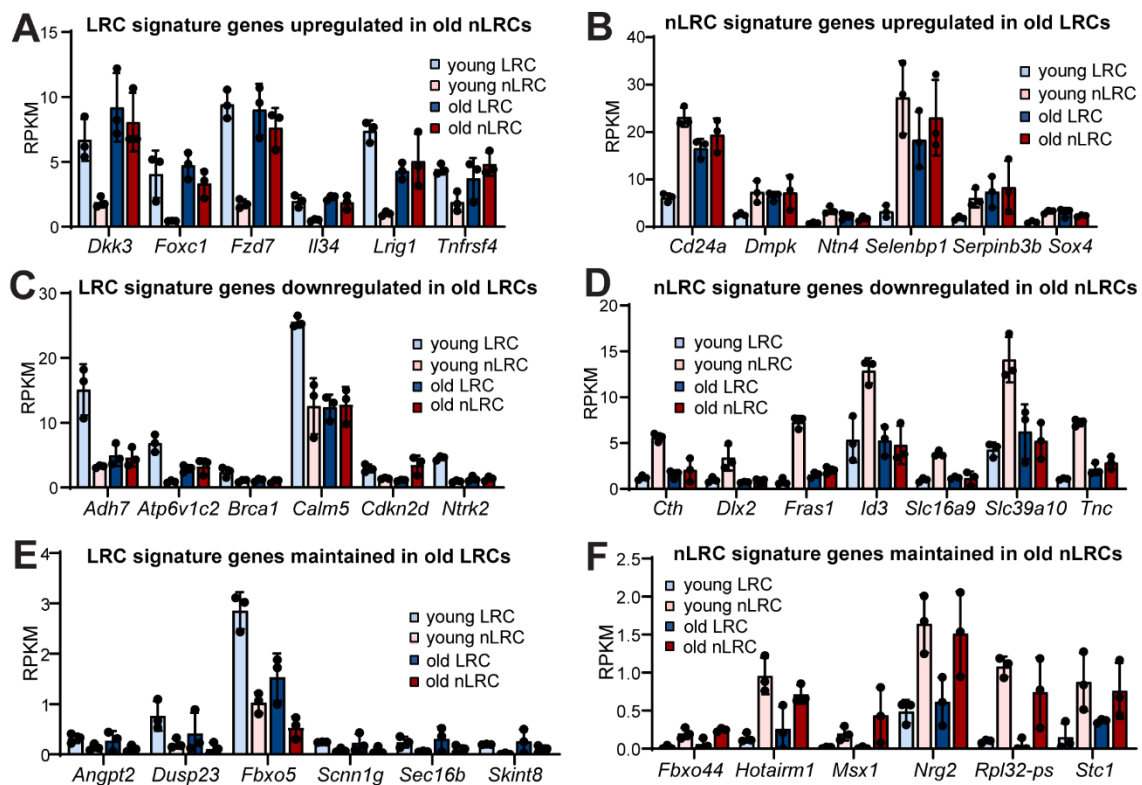

### Appendix Figure S1 - Changes in slow- and fast-cycling epidermal stem cells signature gene expression from H2B-GFP mice during aging.

**A–D.** Examples of  $\geq 2$ -fold upregulated (A, B) or downregulated (C, D) young LRC and nLRC signature genes in the 2-year-old counterparts. Graphs show mean RPKM  $\pm$  S.D.,  $P$  value is at least  $<0.05$  from t-tests for all the comparisons shown between young LRCs vs nLRCs.

**E, F.** Young LRC or nLRC signature genes for which expression patterns were maintained in the 2-year-old LRCs or nLRCs. Graphs show mean RPKM  $\pm$  S.D. and  $N=3$  mice per group.
