# Supplementary material
Source: PubMed Central journal article supplement (PMC9724670)
Supplement: EMBR-23-e55478-s005.pdf [file EMBR-23-e55478-s005.pdf]

# The extracellular matrix fibulin 7 maintains epidermal stem cell heterogeneity during skin aging

Erna Raja, Gopakumar Changarathil, Lalhaba Oinam, Jun Tsunozumi, Yen Ngo, Ryutaro Ishii, Takako Sasaki, Kyoko Imanaka-Yoshida, Hiromi Yanagisawa, and Aiko Sada

DOI: N/A

Corresponding author(s): Aiko Sada ([aisada@kumamoto-u.ac.jp](mailto:aisada@kumamoto-u.ac.jp)), Hiromi Yanagisawa ([hkyanagisawa@tara.tsukuba.ac.jp](mailto:hkyanagisawa@tara.tsukuba.ac.jp))

---

## Review Timeline:

|                               |             |
|-------------------------------|-------------|
| Transfer from Review Commons: | 24th May 22 |
| Editorial Decision:           | 8th Jun 22  |
| Revision Received:            | 14th Sep 22 |
| Editorial Decision:           | 28th Sep 22 |
| Revision Received:            | 1st Oct 22  |
| Accepted:                     | 6th Oct 22  |

---

Editor: Achim Breiling

**Review**  
COMMONS

**Transaction Report: This manuscript was transferred to EMBO Reports following peer review at Review Commons.**

(Note: With the exception of the correction of typographical or spelling errors that could be a source of ambiguity, letters and reports are not edited. Depending on transfer agreements, referee reports obtained elsewhere may or may not be included in this compilation. Referee reports are anonymous unless the Referee chooses to sign their reports.)

Dear Dr. Sada,

Thank you for transferring your manuscript from Review Commons to EMBO reports. I went through your manuscript, the referee reports (attached again below), and your revision plan, and decided to ask an expert advisor for an independent opinion. Taking into consideration his/her feedback (you will also find below), I would like to invite you to revise your manuscript with the understanding that all referee concerns (as indicated in your revision plan) and the points of the advisor must be addressed in the revised manuscript or in the final point-by-point response.

Acceptance of your manuscript will depend on a positive outcome of a second round of review. It is EMBO reports policy to allow a single round of revision only and acceptance of the manuscript will therefore depend on the completeness of your responses included in the next, final version of the manuscript.

Revised manuscripts should be submitted within three months of a request for revision. Please contact me to discuss the revision should you need additional time.

When submitting your revised manuscript, please also carefully review the instructions that follow below.

PLEASE NOTE THAT upon resubmission revised manuscripts are subjected to an initial quality control prior to exposition to re-review. Upon failure in the initial quality control, the manuscripts are sent back to the authors, which may lead to delays. Frequent reasons for such a failure are the lack of the data availability section (please see below) and the presence of statistics based on  $n=2$  (the authors are then asked to present scatter plots or provide more data points).

When submitting your revised manuscript, we will require:

1) a .docx formatted version of the final manuscript text (including legends for main figures, EV figures and tables), but without the figures included. Please make sure that changes are highlighted to be clearly visible. Figure legends should be compiled at the end of the manuscript text.

2) individual production quality figure files as .eps, .tif, .jpg (one file per figure), of main figures and EV figures. Please upload these as separate, individual files upon re-submission.

The Expanded View format, which will be displayed in the main HTML of the paper in a collapsible format, has replaced the Supplementary information. You can submit up to 5 images as Expanded View. Please follow the nomenclature Figure EV1, Figure EV2 etc. The figure legend for these should be included in the main manuscript document file in a section called Expanded View Figure Legends after the main Figure Legends section. Additional Supplementary material should be supplied as a single pdf file labeled Appendix. The Appendix should have page numbers and needs to include a table of content on the first page (with page numbers) and legends for all content. Please follow the nomenclature Appendix Figure Sx, Appendix Table Sx etc. throughout the text, and also label the figures and tables according to this nomenclature.

Movies and Datasets should be uploaded separately, using the nomenclature Movie EVx and Dataset EVx. Please provide a legend with title for each movie file as text file and upload it ZIPed together with the movie file. For datasets, please provide a title and legend on the first TAB of the excel file.

For more details, please refer to our guide to authors:

<http://www.embopress.org/page/journal/14693178/authorguide#manuscriptpreparation>

See also our guide for figure preparation:

[http://wol-prod-cdn.literatumonline.com/pb-assets/embo-site/EMBOPress\\_Figure\\_Guidelines\\_061115-1561436025777.pdf](http://wol-prod-cdn.literatumonline.com/pb-assets/embo-site/EMBOPress_Figure_Guidelines_061115-1561436025777.pdf)

See also the guidelines for figure legend preparation:

<https://www.embopress.org/page/journal/14693178/authorguide#figureformat>

3) a .docx formatted letter INCLUDING the reviewers' reports and your detailed point-by-point responses to their comments. As part of the EMBO Press transparent editorial process, the point-by-point response is part of the Review Process File (RPF), which will be published alongside your paper.

4) a complete author checklist, which you can download from our author guidelines

(<https://www.embopress.org/page/journal/14693178/authorguide>). Please insert page numbers in the checklist to indicate where the requested information can be found in the manuscript. The completed author checklist will also be part of the RPF.

Please also follow our guidelines for the use of living organisms, and the respective reporting guidelines:

<http://www.embopress.org/page/journal/14693178/authorguide#livingorganisms>

5) that primary datasets produced in this study (e.g. RNA-seq, CHIP-seq, structural and array data) are deposited in an appropriate public database. If no primary datasets have been deposited, please also state this a dedicated section (e.g. 'No primary datasets have been generated and deposited'), see below.

See also: <http://embor.embopress.org/authorguide#datadeposition>

Please remember to provide a reviewer password if the datasets are not yet public.

The accession numbers and database should be listed in a formal "Data Availability " section (placed after Materials & Methods) that follows the model below. This is now mandatory (like the COI statement). Please note that the Data Availability Section is restricted to new primary data that are part of this study.

# Data availability

The datasets produced in this study are available in the following databases:

- RNA-Seq data: Gene Expression Omnibus GSE46843 (<https://www.ncbi.nlm.nih.gov/geo/query/acc.cgi?acc=GSE46843>)  
- [data type]: [name of the resource] [accession number/identifier/doi] ([URL or identifiers.org/DATABASE:ACCESSION])

\*\*\* Note - All links should resolve to a page where the data can be accessed. \*\*\*

Moreover, I have these editorial requests:

6) We strongly encourage the publication of original source data with the aim of making primary data more accessible and transparent to the reader. The source data will be published in a separate source data file online along with the accepted manuscript and will be linked to the relevant figure. If you would like to use this opportunity, please submit the source data (for example scans of entire gels or blots, data points of graphs in an excel sheet, additional images, etc.) of your key experiments together with the revised manuscript. If you want to provide source data, please include size markers for scans of entire gels, label the scans with figure and panel number, and send one PDF file per figure.

7) Our journal encourages inclusion of \*data citations in the reference list\* to directly cite datasets that were re-used and obtained from public databases. Data citations in the article text are distinct from normal bibliographical citations and should directly link to the database records from which the data can be accessed. In the main text, data citations are formatted as follows: "Data ref: Smith et al, 2001" or "Data ref: NCBI Sequence Read Archive PRJNA342805, 2017". In the Reference list, data citations must be labeled with "[DATASET]". A data reference must provide the database name, accession number/identifiers and a resolvable link to the landing page from which the data can be accessed at the end of the reference. Further instructions are available at: <http://www.embopress.org/page/journal/14693178/authorguide#referencesformat>

8) Regarding data quantification and statistics, please make sure that the number "n" for how many independent experiments were performed, their nature (biological versus technical replicates), the bars and error bars (e.g. SEM, SD) and the test used to calculate p-values is indicated in the respective figure legends. Please also check that all the p-values are explained in the legend, and that these fit to those shown in the figure. Please provide statistical testing where applicable. Please avoid the phrase 'independent experiment', but clearly state if these were biological or technical replicates. See also: <http://www.embopress.org/page/journal/14693178/authorguide#statisticalanalysis>

9) For microscopic images, please add scale bars of similar style and thickness to all the microscopic images, using clearly visible black or white bars (depending on the background). Please place these in the lower right corner of the images. Please do not write on or near the bars in the image but define the size in the respective figure legend.

10) Please note our reference format:

<http://www.embopress.org/page/journal/14693178/authorguide#referencesformat>

11) We updated our journal's competing interests policy in January 2022 and request authors to consider both actual and perceived competing interests. Please review the policy <https://www.embopress.org/competing-interests> and update your competing interests if necessary. Please name this section 'Disclosure and Competing Interests Statement' and put it after the author contributions section.

12) Please reduce the number of key words on the title page to 5 and order the manuscript sections like this:

Title page - Abstract - Introduction - Results - Discussion - Materials and Methods - DAS - Acknowledgements - Author contributions - Disclosure and Competing Interests Statement - References - Figure legends - Expanded View Figure legends

I look forward to seeing a revised version of your manuscript when it is ready. Please let me know if you have questions or comments regarding the revision.

Please use this link to submit your revision: <https://embor.msubmit.net/cgi-bin/main.plex>

Yours sincerely,

Achim Breiling  
Senior Editor  
EMBO Reports

-----  
Advisor:

The authors present an analysis of two populations of basal epidermal cells that they have previously discovered in the tail skin of mice. The existence of these two populations has not been well documented elsewhere in the skin, which makes the manuscript less interesting for a broader audience (the authors should also more clearly state that they are studying mouse tail skin as this is a special region of the skin that behaves differentially due to the scales etc). Some of the central experiments have key technical caveats, some of which are nicely acknowledged by the authors, which is great but nevertheless make interpretations of the data difficult.

Loss of the fast cycling population most likely reflects the fact that these cells represent a more committed cell population - as has been shown for the back skin using Involucrin-Cre (Blanpain lab, more recently Greco&Kasper), so it is not surprising that these clones are "lost" over time as they are on average more differentiated at the moment of labeling. Thus, a loss of these clones does not necessarily mean that stem cell heterogeneity is impacted by aging as the authors propose, it just means that most of the labeled cells in this population were not stem cells to begin with.

As the authors themselves disclose in the limitations of the study, comparing "label retaining cells" as proxies for two distinct stem cell populations is hugely problematic: aging changes the overall rates of tissue turnover, the cells that retain label in the aged mice can be very different from the young mice, substantially limiting the interpretability of the RNAseq data.

An additional caveat of the RNAseq is that its done from back skin, which as said is very different from tail. Given the two technical caveats of the RNAseq, the main solid findings in this dataset have already been reported: increased DNA damage, metabolism and ecm. Delay in wound healing upon aging has been demonstrated in multiple studies, as are the changes in inflammation and extracellular matrix, as mentioned above.

The two reviewers focus on improving the analysis on the role of Fibulin. Addressing this will indeed strengthen the manuscript. If the experimental plan really works out as the authors propose (including the in vitro experiments and the new antibody, which I think are critical), I would think that the manuscript might be suitable.

-----  
Referee #1:

The authors previously showed that the skin epidermis contains 2 distinct populations of stem cells: slow cycling stem cells (Dlx1+) that persist over time, and faster cycling stem cell populations (marked by Slc1a3) that disappear in aged skin. What determines whether a stem cell proliferates faster or slower remains unclear and is an important question in skin biology. To address this point and to characterize these populations, the Sada & Yangisawa groups lineage traced both populations and subjected them to RNA seq. As expected, principal component analysis grouped the different stem cell populations into distinct clusters. Gene ontology analysis revealed that genes involved in DNA repair & replication, telomere function and chromatin regulation were significantly reduced in aged slow cycling stem cells, whilst genes related to immune response were upregulated.

Generally, aged slow and fast cycling cells were characterized by changes in cell metabolism, cell adhesion, ECM, inhibition of proliferation, activation of differentiation and hair follicle development.

The authors then found that the secreted glycoprotein and ECM component fibulin 7 (Fbln7) was upregulated in fast cycling stem cells of 2 year old mice. To determine the significance of this finding, lineage tracing of different stem cell populations was conducted in Fbln7a knockout mice. 1 year old Fbln7a ko mice exhibited a decreased number (and size) of fast cycling stem cell clones (as compared to WT or young Fbln7a deficient mice). In contrast, Fbln7a depletion does not appear to affect slow cycling stem cells. In addition, Fbln7a depletion exacerbates wound healing deficiencies in aged (but not young) mice and triggered increased expression of inflammatory response genes. The MAPK pathway and cytokine production was upregulated while chemotaxis genes were downregulated. To test whether there was lineage misspecification, they examined K14 expression. There appeared to be an increase in basal to suprabasal expansion of K14+ cells in Fbln7a ko mice. This seems to be progressive, confined to scale region and was only observed in aged mice.

To identify potential factors that interact with fibulin 7, conditioned media from fib7 overexpressing cells was co-eluted with fibulin 7 from an affinity column and identified via mass spec. Fib7 interacts with collagen IV, tenascin, periostin and Ccdc80. Depletion

of fib7 leads to transcriptional upregulation of ColIV and a slight thickening of CoIV in the basement membrane in scale skin. Similarly, ColIV increases in aged basement membrane of skin. Lastly, overexpression of Fib7 in human primary keratinocytes decreased differentiation markers and slowed proliferation. This phenotype was dependent on its CC domain. In conclusion the authors identified Fib7a as an important ECM component involved in "regulating" slow stem cell proliferation in mouse skin.

This reviewer has a few points that may improve the paper and provide further mechanistic insight:

The overall gist of this paper is that fibulin 7 plays an important role in regulating proliferation of stem cells.

A major concern is that the authors do not show where fibulin is expressed in mouse skin. Most of the data is based on transcriptional analysis and should be further verified /strengthened by immunofluorescence staining or western blotting.

Another key question is: How does fibulin depletion diminish the number of fast cycling stem cells in aged mice. Does fibulin depletion take off the (proliferation) breaks in fast cycling stem cells in younger mice? The authors conduct BrdU incorporation in young and aged mice (Figure S3). The data is not conclusive - possibly because they looked at overall BrdU incorporation, rather than distinguishing the fast and slow cycling populations (by IF) and analyze BrdU incorp in the different populations. Speeding up proliferation - thereby ending up with more replication cycles (and telomere shortening) would be in agreement with fibulin depletion upregulating the MAPK pathway (Fig 4B).

Many of the figures rely heavily on the analysis of transcriptome data (RNAseq) and lack further mechanistic follow up studies. For instance, on page 9, the authors mention that GO analysis show that genes involved in DNA repair, telomere maintenance etc are downregulated in 2 years old LRC. Is there any evidence that these cells accumulate DNA damage? This could be analyzed by DNA damage response markers  $\gamma$ -H2AX and 53BP1.

How does fibulin 7 depletion affect deposition of other key components of the ECM, for instance collagen XVII?

**\*\*Minor points:\*\***

Figure 6: Overexpression of fibulin in vitro slows down proliferation. I think it is important to provide western blots to compare the levels of ectopically expressed fibulin 7 and CC mutant in comparison to endogenous levels. Similarly, have the authors looked at the consequences of fibulin depletion in vitro? Will the cells proliferate faster?

It would be interesting to investigate the consequences of fibulin 7 overexpression in vivo. Would it enhance wound repair in aged mouse skin or affect skin or hair development? These experiments would increase the impact of this paper, but given the time consuming nature of such experiments (2 years), they are well beyond the scope of the current manuscript.

Results section: first subtitle: can the authors rephrase this title? "Fast cycling stem cells are gradually lost and compartments of distinct stem cell populations impaired during aging" maybe it can be changed to "Fast cycling stem cells are gradually lost during aging".

In the discussion, please elaborate on the increased expression of Hair follicle development pathways in aged LRC. Does this bear any physiological relevance?

The color legends of Figures S3B,C,E,F do not match the colors of the bars. As mentioned earlier, this analysis looks at overall proliferation. Could the authors focus on the fast-cycling stem cell population?

Page 8: Please provide full name of LRC: it probably stands for label retaining cells (LRC) vs non-label retaining cells (nLRC).

**\*\*Significance\*\***

Overall, this is a very well written paper. The results are presented in a clear and concise manner. The topic is of importance for skin regeneration and skin aging.

-----  
Referee #2:

In this manuscript, the authors demonstrated that fast-cycling epidermal stem cells are gradually depleted with aging, and Fibulin-7, an ECM component, is involved in this age-dependent stem cell depletion.

**\*\*Major points\*\***

1. In Fig 2, the authors identified several ECM genes and selected Fbln7 gene for further analysis. For the readers, the authors also should reveal the other ECM genes that were upregulated in old nLRCs. In addition, the expression of Fibulin-7 protein in the skin should be also analyzed in young and old mice.

2. In Fig 3F and G, the authors clearly demonstrated delayed wound healing in Fbln7 hetero and KO mice. However, Fibulin7 might have a function in the dermis, which is involved in delayed wound healing. Histological analysis should be performed to indicate that delayed wound healing results from impaired reepithelialization.
3. In Fig 6, the authors demonstrated that Fibulin-7 maintains epidermal stem cells at the undifferentiated state. The authors also suggested that Fibulin-7 modulates the COLIV and maintains epidermal stem cells in Fig. 5. Mouse keratinocytes can be cultured on a COLIV-coated dish. Can overexpression of Fibulin-7 modulate keratinocyte differentiation on the COLIV-coated dish? This experiment clearly demonstrates the Fibulin-7/COLIV axis for epidermal stem cell maintenance.
4. The fast-cycling epidermal stem cells are depleted in old mice and Fibulin-7 KO mice. These results suggest that Fibulin-7 is required for the maintenance of the fast-cycling epidermal stem cells in old mice. However, fibulin-7 is increased in old nLRCs (fast-cycling epidermal stem cells).

**\*\*Minor points\*\***

1. On page 12, the sentence "Intriguingly, ...." is duplicated.
2. On page 24, the authors should describe which proteins are coated on the dishes for the culture of mouse keratinocytes. This information is crucial since this study focuses on the role of ECM proteins in keratinocyte stem cell regulation.
3. In Fig 5D and E, the authors displayed uneven distribution of COLIV in Fbln7 KO and old mice. But, it was not clear. Does the uneven distribution mean excess deposition of COLIV or discontinuous staining of COLIV?
2. Significance:

**\*\*Significance\*\***

This study has originally extended the previous report (Sada et al, Nat Cell Biol 2016) and contains novel findings. In particular, the age-associated regulation of epidermal stem cells by Fibulin-7 is worth to share the research community. I recommend that this manuscript should be published if the authors address the above points.

**Manuscript number:** EMBOR-2022-55478V1 (RC-2022-01328)

**Corresponding author(s):** Aiko Sada, Hiromi Yanagisawa

## 1. General Statements

We are grateful for the constructive insights and comments that the reviewers provided. We have addressed all these comments by performing the proposed experiments in the previous revision plan.

## 2. Point-by-point description of the revisions

### **Advisor:**

The authors present an analysis of two populations of basal epidermal cells that they have previously discovered in the tail skin of mice. The existence of these two populations has not been well documented elsewhere in the skin, which makes the manuscript less interesting for a broader audience (the authors should also more clearly state that they are studying mouse tail skin as this is a special region of the skin that behaves differentially due to the scales etc). Some of the central experiments have key technical caveats, some of which are nicely acknowledged by the authors, which is great but nevertheless make interpretations of the data difficult.

We thank the advisor for the critical comments. Although differentiation lineages of the scale and interscale structures are unique to the tail skin, the fast- and slow-cycling stem cell populations are not only found in the tail skin but also observed in the human skin (Ghuwalewala et al., *EMBO J.* 2022). In addition, the eye corneal/conjunctival epithelium is also regenerated from the compartmentalized stem cell populations like the tail skin epidermis (Altshuler et al., *Cell Stem Cell.* 2021; Ishii et al., *Development.* 2020).

So, although we use the tail skin as a primary study model, we believe that the principal findings from these two stem cell populations during aging may also be relevant in the human skin and other epithelial tissues.

We added explanations in the introduction of the manuscript to clarify this point better (page 5, line 18-20).

Loss of the fast cycling population most likely reflects the fact that these cells represent a more committed cell population - as has been shown for the back skin using *Involucrin-Cre* (Blanpain lab, more recently Greco&Kasper), so it is not surprising that these clones are "lost" over time as they are on average more differentiated at the

moment of labeling. Thus, a loss of these clones does not necessarily mean that stem cell heterogeneity is impacted by aging as the authors propose, it just means that most of the labeled cells in this population were not stem cells to begin with.

We thank the advisor for raising this point. The non-LRC or fast-cycling population was characterized previously as undifferentiated as the LRC or the slow-cycling stem cells by microarray gene expression data (Sada et al. NCB, 2016) and more recently by single-cell RNA sequencing (Ghuwalewala et al., EMBO J, 2022). This is in contrast to the Inv-positive progenitor cells, as reported previously.

We added explanations in the introduction of the manuscript about this point (page 5, line 22-24).

As the authors themselves disclose in the limitations of the study, comparing "label-retaining cells" as proxies for two distinct stem cell populations is hugely problematic: aging changes the overall rates of tissue turnover, and the cells that retain the label in the aged mice can be very different from the young mice, substantially limiting the interpretability of the RNAseq data.

Although the stem cells in the aged population may be different from the young ones, which we have acknowledged as a limitation of our study, aged slow- or fast- cycling stem cells still hold some differences in their proliferation rates (Figure EV2A). Changes in the gene expression of the surviving aged stem cells (fast or slow) are as described, and we believe it is still informative and may be indicative of some aging mechanism that has occurred in the aged stem cells with lower or higher proliferation rates.

An additional caveat of the RNAseq is that its done from back skin, which as said is very different from tail. Given the two technical caveats of the RNAseq, the main solid findings in this dataset have already been reported: increased DNA damage, metabolism and ecm. Delay in wound healing upon aging has been demonstrated in multiple studies, as are the changes in inflammation and extracellular matrix, as mentioned above.

The comparison between young and aged LRC or nLRC was made using RNAseq from the tail skin. The RNAseq from Fbln7 WT vs. KO was indeed from the back skin, although it was also previously characterized that the back skin similarly contains the fast- and slow-cycling stem cell populations (Sada et al., NCB 2016).



The slow-cycling nature of SC is thought to reduce replication stress and inhibit aging, but conversely, mutations acquired in slow-cycling SC may accumulate over time due to an error-prone DNA repair pathway (Tumpel & Rudolph, 2019). It remains unclear whether this slow cycle rate maintains the long-term potential for SC and serves as a mechanism to delay stem cell aging due to the lack of a study model. In this study, we demonstrated that the fast-cycling population was indeed depleted while the slow-cycling population was maintained in the same tissue during a two-year chronological aging process. We believe this finding provides insight into the significance of proliferative heterogeneity of tissue stem cells in aging.

We clarified the above points in the manuscript's introduction (page 5, line 6-11).

In addition, it has not been previously reported that fibulin 7 is an ECM that functions in the skin. Our data that fibulin 7 supports stem cell heterogeneity during aging is a novel aspect of this study.

The two reviewers focus on improving the analysis on the role of Fibulin. Addressing this will indeed strengthen the manuscript. If the experimental plan really works out as the authors propose (including the in vitro experiments and the new antibody, which I think are critical), I would think that the manuscript might be suitable.

We have performed additional experiments suggested by the reviewers and revised our manuscript. We are pleased to report that we addressed all the comments we proposed in the revision plan.

**Referee #1:**

The authors previously showed that the skin epidermis contains 2 distinct populations of stem cells: slow cycling stem cells (Dlx1+) that persist over time, and faster cycling stem cell populations (marked by Slc1a3) that disappear in aged skin. What determines whether a stem cell proliferates faster or slower remains unclear and is an important question in skin biology. To address this point and to characterize these populations, the Sada & Yangisawa groups lineage traced both populations and subjected them to RNA seq. As expected, principal component analysis grouped the different stem cell populations into distinct clusters. Gene ontology analysis revealed that genes involved in DNA repair & replication, telomere function and chromatin regulation were significantly reduced in aged slow cycling stem cells, whilst genes related to immune response were upregulated.

Generally, aged slow and fast cycling cells were characterized by changes in cell metabolism, cell adhesion, ECM, inhibition of proliferation, activation of differentiation and hair follicle development.

The authors then found that the secreted glycoprotein and ECM component fibulin 7 (Fbln7) was upregulated in fast cycling stem cells of 2 year old mice. To determine the significance of this finding, lineage tracing of different stem cell populations was conducted in Fbln7a knockout mice. 1 year old Fbln7a ko mice exhibited a decreased number (and size) of fast cycling stem cell clones (as compared to WT or young Fbln7a deficient mice). In contrast, Fbln7a depletion does not appear to affect slow cycling stem cells. In addition, Fbln7a depletion exacerbates wound healing deficiencies in aged (but not young) mice and triggered increased expression of inflammatory response genes. The MAPK pathway and cytokine production was upregulated while chemotaxis genes were downregulated. To test whether there was lineage misspecification, they examined K14 expression. There appeared to be an increase in basal to suprabasal expansion of K14+ cells in Fbln7a ko mice. This seems to be progressive, confined to scale region and was only observed in aged mice.

To identify potential factors that interact with fibulin 7, conditioned media from fib7 overexpressing cells was co-eluted with fibulin 7 from an affinity column and identified via mass spec. Fib7 interacts with collagen IV, tenascin, periostin and Ccdc80. Depletion of fib7 leads to transcriptional upregulation of CollV and a slight thickening of ColV in the basement membrane in scale skin. Similarly, CollV increases in aged basement membrane of skin. Lastly, overexpression of Fib7 in human primary keratinocytes decreased differentiation markers and slowed proliferation. This phenotype was dependent on its CC domain. In conclusion the authors identified Fib7a as an important ECM component involved in "regulating" slow stem cell proliferation in mouse skin.

**We appreciate the reviewer's positive comments and suggestions. We have performed additional experiments and revised the manuscript, as suggested by the reviewer.**

This reviewer has a few points that may improve the paper and provide further mechanistic insight:

The overall gist of this paper is that fibulin 7 plays an important role in regulating proliferation of stem cells.

A major concern is that the authors do not show where fibulin is expressed in mouse skin. Most of the data is based on transcriptional analysis and should be further verified /strengthened by immunofluorescence staining or western blotting.

We have validated the new monoclonal antibody using tail skin from *Fbln7* WT vs. KO and observed its localization in the basement membrane (New figures 2H and EV3A, B). When comparing C57BL/6J WT mice from 2-3 months old to 2 years old, we saw downregulation of fibulin 7 protein expression (New figures 2H, I). Despite the upregulation of the mRNA expression in the aged fast-cycling stem cells, which we have not understood the mechanism yet, the decrease in fibulin 7 protein in aged skin would explain its function in maintaining the fast-cycling stem cells, and its loss of expression led to early depletion of these stem cells.

In the manuscript, we clarified the above points in the results and discussion (page 10, line 16-22, page 11 line 1-2).

Another key question is: How does fibulin depletion diminish the number of fast cycling stem cells in aged mice. Does fibulin depletion take off the (proliferation) breaks in fast cycling stem cells in younger mice? The authors conduct BrdU incorporation in young and aged mice (Figure S3). The data is not conclusive - possibly because they looked at overall BrdU incorporation, rather than distinguishing the fast and slow cycling populations (by IF) and analyze BrdU incorp in the different populations. Speeding up proliferation - thereby ending up with more replication cycles (and telomere shortening) would be in agreement with fibulin depletion upregulating the MAPK pathway (Fig 4B).

We thank the reviewer for their suggestion. We examined proliferation in sagittal skin sections and counted Ki67 positive cells within the *Slc1a3-CreER* labeled fast-cycling basal stem cells at 1-week post-tamoxifen injection. Our new data suggest that indeed *Fbln7* KO resulted in more proliferation in the young adult tail skin (2-3m old), which may contribute to the diminishing fast cycling stem cells in the aged *Fbln7* KO skin (New figure 3D, E).

In the manuscript, we clarified the above points in the results and discussion (page 11 line 9-11).

Many of the figures rely heavily on the analysis of transcriptome data (RNAseq) and lack further mechanistic follow up studies. For instance, on page 9, the authors mention that GO analysis show that genes involved in DNA repair, telomere maintenance etc are downregulated in 2 years old LRC. Is there any evidence that these cells accumulate

DNA damage? This could be analyzed by DNA damage response markers  $\gamma$ -H2AX and 53BP1.

As suggested, we assessed DNA damage markers such as  $\gamma$ -H2AX and 8-oxo-dG in the tail skin of young adult (2-3 months) vs. aged (2 years old) mice. Staining with  $\gamma$ -H2AX yielded no signal even in 2 years old tail skin. 8-oxo-dG staining showed some positive cells in the interscale of 2 years old tail skin, albeit at a rare frequency (New figure EV2 H, I). This may be attributed to the elimination of DNA-damaged stem cells by differentiation, as also observed by suprabasal cell staining.

In the manuscript, we clarified the above points in the results and discussion (page 9 line 5-7).

How does fibulin 7 depletion affect deposition of other key components of the ECM, for instance collagen XVII?

As suggested by the reviewer, we evaluated if collagen XVII level changes upon loss of *Fbln7*. Col XVII staining shows that its level is decreased in both scale and interscale of *Fbln7* KO mice at 1-year-old (New figures EV5 G-I). This is in line with the previous finding that Collagen XVII is downregulated in aging skin. In C57BL/6J WT mice, the decreasing trend in Col XVII was seen in the scale and interscale but interestingly more significant in the interscale region of the 2-year-old mice.

We also showed that laminin, a major component of basement membrane that is also a fibulin 7 interactor (based on our mass spec screen), is downregulated in the absence of *Fbln7* at 1-year-old (New figures EV5 D-F).

These points were addressed in results and discussion page 14, line 12-20

**\*\*Minor points:\*\***

Figure 6: Overexpression of fibulin in vitro slows down proliferation. I think it is important to provide western blots to compare the levels of ectopically expressed fibulin 7 and CC mutant in comparison to endogenous levels. Similarly, have the authors looked at the consequences of fibulin depletion in vitro? Will the cells proliferate faster?

The endogenous mRNA expression of fibulin 7 in our primary newborn keratinocytes is very low or zero according to the Ct values we obtained (very close to Ct 40 or

undetected). We think that we will not be able to detect endogenous levels of fibulin 7 protein in these cells.

Due to this reason, we have not performed the reverse experiment to deplete fibulin 7 expression in vitro and look at proliferation. We attempted to isolate primary newborn keratinocytes from WT and *Fbln7* KO mice; however, it failed even in the WT, and we believe due to a different genetic background (129EvSv; C57BL6/J) from C57BL6/J. We have also tried to isolate primary keratinocytes from the tail of young adult or aged mice, but these cells have so far been unable to grow continuously in culture.

It would be interesting to investigate the consequences of fibulin 7 overexpression in vivo. Would it enhance wound repair in aged mouse skin or affect skin or hair development? These experiments would increase the impact of this paper, but given the time consuming nature of such experiments (2 years), they are well beyond the scope of the current manuscript.

As the reviewer kindly indicated, the time required to complete this experiment would be too long, and we think it is beyond the scope of this manuscript.

Results section: first subtitle: can the authors rephrase this title? "Fast cycling stem cells are gradually lost and compartments of distinct stem cell populations impaired during aging" maybe it can be changed to "Fast cycling stem cells are gradually lost during aging".

We agreed and changed it as suggested by the reviewer (page 6, line 10).

In the discussion, please elaborate on the increased expression of Hair follicle development pathways in aged LRC. Does this bear any physiological relevance?

We have not observed any hair follicle-specific proteins in the IFE of aged mice even though their genes were upregulated according to the RNAseq results. We think this could be the mis-regulation of lineage genes at the genomic or epigenetic level as a reflection of increasing genomic instability during aging. However, not necessarily translated into protein expression changes or lineage modifications.

The color legends of Figures S3B,C,E,F do not match the colors of the bars. As mentioned earlier, this analysis looks at overall proliferation. Could the authors focus on the fast-cycling stem cell population?

We corrected the bar colors (new Figure EV3G, H, J, K). We analyzed the proliferation of the fast-cycling stem cell population by measuring Ki67 in the Slc1a3-positive tdTomato clones in the young adult mice (new Figure 3D, E).

In the manuscript text, this was indicated in page 11, line 9-11.

Page 8: Please provide full name of LRC: it probably stands for label retaining cells (LRC) vs non-label retaining cells (nLRC).

We indicated the full name of LRC (label-retaining cells) and nLRC (non label-retaining cells) on page 8, line 2-4.

**\*\*Significance\*\***

Overall, this is a very well written paper. The results are presented in a clear and concise manner. The topic is of importance for skin regeneration and skin aging.

We are thankful to the reviewer for the positive comments and constructive feedback.

#### **Referee #2:**

In this manuscript, the authors demonstrated that fast-cycling epidermal stem cells are gradually depleted with aging, and Fibulin-7, an ECM component, is involved in this age-dependent stem cell depletion.

**\*\*Major points\*\***

In Fig 2, the authors identified several ECM genes and selected Fbln7 gene for further analysis. For the readers, the authors also should reveal the other ECM genes that were upregulated in old nLRCs. In addition, the expression of Fibulin-7 protein in the skin should be also analyzed in young and old mice.

There were a few other ECM genes upregulated in old nLRCs with a p-value <0.05. Among these were *Col4a2*, *Col6a1*, *Lgals1*, *Postn*, *, *Col8a1*. *Fn1* was expressed at a low RPKM value and was excluded. We examined the Periostin expression pattern in young vs. old skin, and although the dermal expression was reduced, no apparent changes were seen in the basal layer of the aged epidermis. *Col8a1* is part of the basement membrane collagens and was already reported to be increased in the aging human skin (McCabe et al., 2020; Li et al., 2021). We decided then to explore fibulin 7,*

which has no reported function in the skin. We summarized these results in the new figure EV2K.

The expression of fibulin 7 in the young and old mice was tested using a newly raised monoclonal antibody (New figures 2H, I). Fibulin 7 protein expression was decreased in the epithelium and basement membrane of old tail skin (2-year-old compared to 2-3 months old), in line with the decreasing skin function and fast-cycling stem cells in the aged skin. The mechanism of the increased *Fbln7* mRNA is not understood but could be part of a response to the increased inflammatory environment in aging skin.

This was mentioned in the results and discussion of the manuscript on page 17, line 8-11.

In Fig 3F and G, the authors clearly demonstrated delayed wound healing in *Fbln7* hetero and KO mice. However, Fibulin7 might have a function in the dermis, which is involved in delayed wound healing. Histological analysis should be performed to indicate that delayed wound healing results from impaired reepithelialization.

**Response:** We performed H&E staining to see if re-epithelialization is impaired. H&E staining results and quantifications illustrate the thicker and longer epithelial `tongue` at the healing front of *Fbln7* WT skin, suggesting a better re-epithelialization process in the presence of *Fbln7* (New figures 3H-J).

In the manuscript, it was addressed on page 12, line 10-12.

In Fig 6, the authors demonstrated that Fibulin-7 maintains epidermal stem cells at the undifferentiated state. The authors also suggested that Fibulin-7 modulates the COLIV and maintains epidermal stem cells in Fig. 5. Mouse keratinocytes can be cultured on a COLIV-coated dish. Can overexpression of Fibulin-7 modulate keratinocyte differentiation on the COLIV-coated dish? This experiment clearly demonstrates the Fibulin-7/COLIV axis for epidermal stem cell maintenance.

We performed the proposed experiment and evaluated the effect of fibulin7 gain-of-function on differentiation in the presence or absence of ColIV coating on the dish. New experiments to differentiate keratinocytes in the presence or absence of Col IV suggests that Fibulin 7 overexpression could suppress differentiation (as measured by Krt1 and Krt10 markers) even with the addition of the inducer of differentiation such as CaCl<sub>2</sub> (New figures 5J, K). Col IV coating enhances CaCl<sub>2</sub>-induced differentiation of

keratinocytes, and fibulin-7 overexpression inhibited it significantly in the presence of Col IV.

Nevertheless, with or without Col IV coating, fibulin 7 could inhibit CaCl<sub>2</sub>-induced differentiation. Keratinocytes also express endogenous Col IV. Therefore, it is difficult at this time using this experiment to address if Col IV works together with fibulin 7.

In the manuscript, these experiments were mentioned in results and discussion page 16, line 2-6.

The fast-cycling epidermal stem cells are depleted in old mice and Fibulin-7 KO mice. These results suggest that Fibulin-7 is required for the maintenance of the fast-cycling epidermal stem cells in old mice. However, fibulin-7 is increased in old nLRCs (fast-cycling epidermal stem cells).

Fibulin 7 protein staining suggests that its expression was decreased in the old tail skin epithelium and basement membrane (New Figure 2H, I). This resolves the paradox of its increased mRNA and loss of fast-cycling stem cells in the aged mice. We added a new description on page 10, line 20-22.

The increased mRNA could be due to many factors, such as cells attempting to compensate for changes in the ECM composition during aging, aging-associated inflammatory environment, etc. How fibulin 7 protein expression is decreased would be an interesting follow-up study.

**\*\*Minor points\*\***

On page 12, the sentence "Intriguingly, ...." is duplicated.

We thank the reviewer for the correction. It has been deleted.

On page 24, the authors should describe which proteins are coated on the dishes for the culture of mouse keratinocytes. This information is crucial since this study focuses on the role of ECM proteins in keratinocyte stem cell regulation.

The dishes were not coated for the culture of mouse keratinocytes. As the reviewer suggested, we performed experiments with Col IV coating (New figures 5J, K). *Fbln7* overexpression suppressed keratinocytes differentiation potentiated by Col IV.



In the manuscript, these experiments were mentioned in results and discussion page 16, line 2-6.

In Fig 5D and E, the authors displayed uneven distribution of COLIV in *Fbln7* KO and old mice. But, it was not clear. Does the uneven distribution mean excess deposition of COLIV or discontinuous staining of COLIV?

**Response:** Overall, there was a trend of increased (excess) deposition of Col IV although not always distributed uniformly throughout the IFE, i.e., there are thicker and thinner areas stained by Col IV. This was especially noticed in the 1-year *Fbln7* KO mice. This paragraph was re-phrased in the results and discussion section to simplify our descriptions (page 14, line 7-13).

**\*\*Significance\*\***

This study has originally extended the previous report (Sada et al, Nat Cell Biol 2016) and contains novel findings. In particular, the age-associated regulation of epidermal stem cells by Fibulin-7 is worth to share the research community. I recommend that this manuscript should be published if the authors address the above points.

We are thankful to the reviewer for the positive comments.

Dear Dr. Sada,

Thank you for the submission of your revised manuscript to our editorial offices. I have now received the reports from the two referees that I asked to re-evaluate your study, you will find below. As you will see, both referees now fully supports the publication of your study.

Before proceeding with formal acceptance, I have these editorial requests I ask you to address in a final revised manuscript.

- We updated our journal's competing interests policy in January 2022 and request authors to consider both actual and perceived competing interests. Please review the policy <https://www.embopress.org/competing-interests> and update your competing interests if necessary. Please name this section 'Disclosure and Competing Interests Statement' and put it after the Acknowledgements section.
- We now use CRediT to specify the contributions of each author in the journal submission system. CRediT replaces the author contribution section. Please use the free text box to provide more detailed descriptions. Thus, please remove the author contributions section from the manuscript text file. See also guide to authors: <https://www.embopress.org/page/journal/14693178/authorguide#authorshipguidelines>
- In the "Data Availability section" (DAS) please add direct links to the datasets and remove any referee tokens and make sure these are public latest upon publication of the study.
- Please make sure that the number "n" for how many independent experiments were performed, their nature (biological versus technical replicates), the bars and error bars (e.g. SEM, SD) and the test used to calculate p-values is indicated in the respective figure legends (main and EV figures), and that statistical testing has been done where applicable. Please avoid phrases like 'independent experiment', but clearly state if these were biological or technical replicates. Please add complete statistical testing to all diagrams (main and EV figures). Please also indicate (e.g. with n.s.) if testing was performed, but the differences are not significant. In case n=2, please show the data as separate datapoints without error bars and statistics (see Fig. EV3K). It seems presently some graphs still have only partial statistics. Please check.
- Please make sure that all figure panels are called out, that they are called out separately and sequentially. Presently, callouts for Fig. 3B, 3C, 5h seem missing. Moreover, Fig. 4H is called out before 4G. Please check.
- Please make sure that all the funding information is also entered into the online submission system and that it is complete and similar to the one in the acknowledgement section of the manuscript text file. The funding info needs updating in the submission system. Funders should be placed in the first column, and grant reference numbers in the second.
- Finally, please find attached a word file of the manuscript text (provided by our publisher) with changes we ask you to include in your final manuscript text, and some queries, we ask you to address. Please provide your final manuscript file (using the attached file as basis) with track changes, in order that we can see any modifications done.

In addition, I would need from you:

- a short, two-sentence summary of the manuscript (not more than 35 words).
- two to four short (!) bullet points highlighting the key findings of your study (two lines each).
- a schematic summary figure (in jpeg, png or tiff format with the exact width of 550 pixels and a height of not more than 400 pixels) that can be used as a visual synopsis on our website.

I look forward to seeing the final revised version of your manuscript when it is ready. Please let me know if you have questions regarding the revision.

Please use this link to submit your revision: <https://embor.msubmit.net/cgi-bin/main.plex>

Best,

Achim Breiling  
Senior Editor  
EMBO Reports

-----  
Referee #1:

The authors have done an excellent job addressing the points that I raised during my initial review of the manuscript. They conducted additional staining with ColXVII, Fbln7 and a DNA damage marker and quantified the staining intensity. The

manuscript is well-written and the data presented in a concise manner. I have no further comments and recommend publication of the manuscript.

-----  
Referee #2:

The authors have addressed all of my concerns. The revised manuscript is suitable for the publication in EMBO reports.

The authors have addressed all minor editorial requests.

Dr. Aiko Sada  
Kumamoto University  
International Research Center for Medical Sciences (IRCMS)  
2-1-1 Honjo  
Chuo-ku  
Kumamoto City, Kumamoto 860-0811  
Japan

Dear Dr. Sada,

I am very pleased to accept your manuscript for publication in the next available issue of EMBO reports. Thank you for your contribution to our journal.

At the end of this email I include important information about how to proceed. Please ensure that you take the time to read the information and complete and return the necessary forms to allow us to publish your manuscript as quickly as possible.

As part of the EMBO publication's Transparent Editorial Process, EMBO reports publishes online a Review Process File to accompany accepted manuscripts. As you are aware, this File will be published in conjunction with your paper and will include the referee reports, your point-by-point response and all pertinent correspondence relating to the manuscript.

If you do NOT want this File to be published, please inform the editorial office within 2 days, if you have not done so already, otherwise the File will be published by default [contact: emboreports@embo.org]. If you do opt out, the Review Process File link will point to the following statement: "No Review Process File is available with this article, as the authors have chosen not to make the review process public in this case."

Should you be planning a Press Release on your article, please get in contact with emboreports@wiley.com as early as possible, in order to coordinate publication and release dates.

Thank you again for your contribution to EMBO reports and congratulations on a successful publication. Please consider us again in the future for your most exciting work.

Yours sincerely,

Achim Breiling  
Senior Editor  
EMBO Reports

\*\*\*\*\*

#### THINGS TO DO NOW:

You will receive proofs by e-mail approximately 2-3 weeks after all relevant files have been sent to our Production Office; you should return your corrections within 2 days of receiving the proofs.

EMBO Press participates in many Publish and Read agreements that allow authors to publish Open Access with reduced/no publication charges. Check your eligibility: <https://authorservices.wiley.com/author-resources/Journal-Authors/open-access/affiliation-policies-payments/index.html>

Please inform us if there is likely to be any difficulty in reaching you at the above address at that time. Failure to meet our deadlines may result in a delay of publication, or publication without your corrections.

All further communications concerning your paper should quote reference number EMBOR-2022-55478V3 and be addressed to emboreports@wiley.com.

Should you be planning a Press Release on your article, please get in contact with emboreports@wiley.com as early as possible, in order to coordinate publication and release dates.

## EMBO Press Author Checklist

|                                                         |
|---------------------------------------------------------|
| Corresponding Author Name: Aiko Sada; Hiromi Yanagisawa |
| Journal Submitted to: EMBO Reports                      |
| Manuscript Number: EMBOR-2022-55478V1                   |

### USEFUL LINKS FOR COMPLETING THIS FORM

- [The EMBO Journal - Author Guidelines](#)
- [EMBO Reports - Author Guidelines](#)
- [Molecular Systems Biology - Author Guidelines](#)
- [EMBO Molecular Medicine - Author Guidelines](#)

### Reporting Checklist for Life Science Articles (updated January 2022)

This checklist is adapted from Materials Design Analysis Reporting (MDAR) Checklist for Authors. MDAR establishes a minimum set of requirements in transparent reporting in the life sciences (see Statement of Task: [10.31222/osf.io/9sm4x](https://doi.org/10.31222/osf.io/9sm4x)). Please follow the journal's guidelines in preparing your manuscript.

**Please note that a copy of this checklist will be published alongside your article.**

### Abridged guidelines for figures

#### 1. Data

The data shown in figures should satisfy the following conditions:

- the data were obtained and processed according to the field's best practice and are presented to reflect the results of the experiments in an accurate and unbiased manner.
- ideally, figure panels should include only measurements that are directly comparable to each other and obtained with the same assay.
- plots include clearly labeled error bars for independent experiments and sample sizes. Unless justified, error bars should not be shown for technical replicates.
- if  $n < 5$ , the individual data points from each experiment should be plotted. Any statistical test employed should be justified.
- Source Data should be included to report the data underlying figures according to the guidelines set out in the authorship guidelines on Data Presentation.

#### 2. Captions

Each figure caption should contain the following information, for each panel where they are relevant:

- a specification of the experimental system investigated (eg cell line, species name).
- the assay(s) and method(s) used to carry out the reported observations and measurements.
- an explicit mention of the biological and chemical entity(ies) that are being measured.
- an explicit mention of the biological and chemical entity(ies) that are altered/varied/perturbed in a controlled manner.
- the exact sample size (n) for each experimental group/condition, given as a number, not a range;
- a description of the sample collection allowing the reader to understand whether the samples represent technical or biological replicates (including how many animals, litters, cultures, etc.).
- a statement of how many times the experiment shown was independently replicated in the laboratory.
- definitions of statistical methods and measures:
  - common tests, such as t-test (please specify whether paired vs. unpaired), simple  $\chi^2$  tests, Wilcoxon and Mann-Whitney tests, can be unambiguously identified by name only, but more complex techniques should be described in the methods section;
  - are tests one-sided or two-sided?
  - are there adjustments for multiple comparisons?
  - exact statistical test results, e.g., P values = x but not P values < x;
  - definition of 'center values' as median or average;
  - definition of error bars as s.d. or s.e.m.

**Please complete ALL of the questions below.**  
Select "Not Applicable" only when the requested information is not relevant for your study.

### Materials

| Category                                                                                                                                                                                                      | Information included in the manuscript? | In which section is the information available?<br><small>(Reagents and Tools Table, Materials and Methods, Figures, Data Availability Section)</small> |
|---------------------------------------------------------------------------------------------------------------------------------------------------------------------------------------------------------------|-----------------------------------------|--------------------------------------------------------------------------------------------------------------------------------------------------------|
| <b>Newly Created Materials</b>                                                                                                                                                                                |                                         |                                                                                                                                                        |
| New materials and reagents need to be available; do any restrictions apply?                                                                                                                                   | Yes                                     | Materials and Methods (Fibulin 7 antibody)                                                                                                             |
| <b>Antibodies</b>                                                                                                                                                                                             |                                         |                                                                                                                                                        |
| For antibodies provide the following information:<br>- Commercial antibodies: RRID (if possible) or supplier name, catalogue number and/or clone number<br>- Non-commercial: RRID or citation                 | Yes                                     | Materials and Methods                                                                                                                                  |
| <b>DNA and RNA sequences</b>                                                                                                                                                                                  |                                         |                                                                                                                                                        |
| Short novel DNA or RNA including primers, probes: provide the sequences.                                                                                                                                      | Yes                                     | Materials and Methods                                                                                                                                  |
| <b>Cell materials</b>                                                                                                                                                                                         |                                         |                                                                                                                                                        |
| <b>Cell lines:</b> Provide species information, strain. Provide accession number in repository OR supplier name, catalog number, clone number, and/OR RRID.                                                   | Yes                                     | Materials and Methods                                                                                                                                  |
| <b>Primary cultures:</b> Provide species, strain, sex of origin, genetic modification status.                                                                                                                 | Yes                                     | Materials and Methods                                                                                                                                  |
| Report if the cell lines were recently <b>authenticated</b> (e.g., by STR profiling) and tested for mycoplasma contamination.                                                                                 | Not Applicable                          |                                                                                                                                                        |
| <b>Experimental animals</b>                                                                                                                                                                                   |                                         |                                                                                                                                                        |
| <b>Laboratory animals or Model organisms:</b> Provide species, strain, sex, age, genetic modification status. Provide accession number in repository OR supplier name, catalog number, clone number, OR RRID. | Yes                                     | Materials and Methods                                                                                                                                  |
| <b>Animal observed in or captured from the field:</b> Provide species, sex, and age where possible.                                                                                                           | Not Applicable                          |                                                                                                                                                        |
| Please detail housing and husbandry conditions.                                                                                                                                                               | Yes                                     | Materials and Methods                                                                                                                                  |
| <b>Plants and microbes</b>                                                                                                                                                                                    |                                         |                                                                                                                                                        |
| <b>Plants:</b> provide species and strain, ecotype and cultivar where relevant, unique accession number if available, and source (including location for collected wild specimens).                           | Not Applicable                          |                                                                                                                                                        |
| <b>Microbes:</b> provide species and strain, unique accession number if available, and source.                                                                                                                | Not Applicable                          |                                                                                                                                                        |
| <b>Human research participants</b>                                                                                                                                                                            |                                         |                                                                                                                                                        |
| If collected and within the bounds of privacy constraints report on age, sex and gender or ethnicity for all study participants.                                                                              | Not Applicable                          |                                                                                                                                                        |
| <b>Core facilities</b>                                                                                                                                                                                        |                                         |                                                                                                                                                        |
| If your work benefited from core facilities, was their service mentioned in the acknowledgments section?                                                                                                      | Yes                                     | Acknowledgements                                                                                                                                       |

### Design

| Study protocol                                                                                                                                                                                                                                                                                                                             | Information included in the manuscript? | In which section is the information available?<br>(Reagents and Tools Table, Materials and Methods, Figures, Data Availability Section) |
|--------------------------------------------------------------------------------------------------------------------------------------------------------------------------------------------------------------------------------------------------------------------------------------------------------------------------------------------|-----------------------------------------|-----------------------------------------------------------------------------------------------------------------------------------------|
| If study protocol has been <b>pre-registered</b> , provide DOI in the manuscript. For clinical trials, provide the trial registration number OR cite DOI.                                                                                                                                                                                  | Not Applicable                          |                                                                                                                                         |
| Report the <b>clinical trial registration number</b> (at ClinicalTrials.gov or equivalent), where applicable.                                                                                                                                                                                                                              | Not Applicable                          |                                                                                                                                         |
| Laboratory protocol                                                                                                                                                                                                                                                                                                                        | Information included in the manuscript? | In which section is the information available?<br>(Reagents and Tools Table, Materials and Methods, Figures, Data Availability Section) |
| Provide DOI OR other citation details if <b>external detailed step-by-step protocols</b> are available.                                                                                                                                                                                                                                    | Yes                                     | Materials and methods; references                                                                                                       |
| Experimental study design and statistics                                                                                                                                                                                                                                                                                                   | Information included in the manuscript? | In which section is the information available?<br>(Reagents and Tools Table, Materials and Methods, Figures, Data Availability Section) |
| Include a statement about <b>sample size</b> estimate even if no statistical methods were used.                                                                                                                                                                                                                                            | Yes                                     | Materials and Methods                                                                                                                   |
| Were any steps taken to minimize the effects of subjective bias when allocating animals/samples to treatment (e.g. <b>randomization procedure</b> )? If yes, have they been described?                                                                                                                                                     | Yes                                     | Materials and Methods                                                                                                                   |
| Include a statement about <b>blinding</b> even if no blinding was done.                                                                                                                                                                                                                                                                    | Yes                                     | Materials and Methods                                                                                                                   |
| Describe <b>inclusion/exclusion criteria</b> if samples or animals were excluded from the analysis. Were the criteria pre-established?                                                                                                                                                                                                     | Yes                                     | Figure legends                                                                                                                          |
| If sample or data points were omitted from analysis, report if this was due to <b>attrition or intentional exclusion</b> and provide justification.                                                                                                                                                                                        |                                         |                                                                                                                                         |
| For every figure, are <b>statistical tests</b> justified as appropriate? Do the data meet the assumptions of the tests (e.g., normal distribution)? Describe any methods used to assess it. Is there an estimate of variation within each group of data? Is the variance similar between the groups that are being statistically compared? | Yes                                     | Figure legends                                                                                                                          |
| Sample definition and in-laboratory replication                                                                                                                                                                                                                                                                                            | Information included in the manuscript? | In which section is the information available?<br>(Reagents and Tools Table, Materials and Methods, Figures, Data Availability Section) |
| In the figure legends: state number of times the experiment was <b>replicated</b> in laboratory.                                                                                                                                                                                                                                           | Yes                                     | Figure legends                                                                                                                          |
| In the figure legends: define whether data describe <b>technical or biological replicates</b> .                                                                                                                                                                                                                                            | Yes                                     | Figure legends                                                                                                                          |

#### Ethics

| Ethics                                                                                                                                                                                                                                                                                                   | Information included in the manuscript? | In which section is the information available?<br>(Reagents and Tools Table, Materials and Methods, Figures, Data Availability Section) |
|----------------------------------------------------------------------------------------------------------------------------------------------------------------------------------------------------------------------------------------------------------------------------------------------------------|-----------------------------------------|-----------------------------------------------------------------------------------------------------------------------------------------|
| Studies involving <b>human participants</b> : State details of <b>authority granting ethics approval</b> (IRB or equivalent committee(s), provide reference number for approval.                                                                                                                         | Not Applicable                          |                                                                                                                                         |
| Studies involving <b>human participants</b> : Include a statement confirming that <b>informed consent</b> was obtained from all subjects and that the experiments conformed to the principles set out in the WMA Declaration of Helsinki and the Department of Health and Human Services Belmont Report. | Not Applicable                          |                                                                                                                                         |
| Studies involving <b>human participants</b> : For publication of <b>patient photos</b> , include a statement confirming that consent to publish was obtained.                                                                                                                                            | Not Applicable                          |                                                                                                                                         |
| Studies involving experimental <b>animals</b> : State details of <b>authority granting ethics approval</b> (IRB or equivalent committee(s), provide reference number for approval. Include a statement of compliance with ethical regulations.                                                           | Yes                                     | Materials and Methods                                                                                                                   |
| Studies involving <b>specimen and field samples</b> : State if relevant <b>permits</b> obtained, provide details of authority approving study; if none were required, explain why.                                                                                                                       | Not Applicable                          |                                                                                                                                         |
| Dual Use Research of Concern (DURC)                                                                                                                                                                                                                                                                      | Information included in the manuscript? | In which section is the information available?<br>(Reagents and Tools Table, Materials and Methods, Figures, Data Availability Section) |
| Could your study fall under dual use research restrictions? Please check biosecurity documents and list of <b>select agents and toxins</b> (CDC): <a href="https://www.selectagents.gov/sat/list.htm">https://www.selectagents.gov/sat/list.htm</a> .                                                    | Not Applicable                          |                                                                                                                                         |
| If you used a select agent, is the security level of the lab appropriate and reported in the manuscript?                                                                                                                                                                                                 | Not Applicable                          |                                                                                                                                         |
| If a study is subject to dual use research of concern regulations, is the name of the <b>authority granting approval</b> and <b>reference number</b> for the regulatory approval provided in the manuscript?                                                                                             | Not Applicable                          |                                                                                                                                         |

#### Reporting

The MDAR framework recommends adoption of discipline-specific guidelines, established and endorsed through community initiatives. Journals have their own policy about requiring specific guidelines and recommendations to complement MDAR.

| Adherence to community standards                                                                                                                                                                                                                                                                                                     | Information included in the manuscript? | In which section is the information available?<br>(Reagents and Tools Table, Materials and Methods, Figures, Data Availability Section) |
|--------------------------------------------------------------------------------------------------------------------------------------------------------------------------------------------------------------------------------------------------------------------------------------------------------------------------------------|-----------------------------------------|-----------------------------------------------------------------------------------------------------------------------------------------|
| State if relevant guidelines or checklists (e.g., ICMJE, MIBBI, ARRIVE, PRISMA) have been followed or provided.                                                                                                                                                                                                                      | Not Applicable                          |                                                                                                                                         |
| For <b>tumor marker prognostic studies</b> , we recommend that you follow the <b>REMARK</b> reporting guidelines (see link list at top right). See author guidelines, under 'Reporting Guidelines'. Please confirm you have followed these guidelines.                                                                               | Not Applicable                          |                                                                                                                                         |
| For <b>phase II and III randomized controlled trials</b> , please refer to the <b>CONSORT</b> flow diagram (see link list at top right) and submit the <b>CONSORT</b> checklist (see link list at top right) with your submission. See author guidelines, under 'Reporting Guidelines'. Please confirm you have submitted this list. | Not Applicable                          |                                                                                                                                         |

#### Data Availability

| Data availability                                                                                                                                                                                 | Information included in the manuscript? | In which section is the information available?<br>(Reagents and Tools Table, Materials and Methods, Figures, Data Availability Section) |
|---------------------------------------------------------------------------------------------------------------------------------------------------------------------------------------------------|-----------------------------------------|-----------------------------------------------------------------------------------------------------------------------------------------|
| Have <b>primary datasets</b> been deposited according to the journal's guidelines (see 'Data Deposition' section) and the respective accession numbers provided in the Data Availability Section? | Yes                                     | Materials and Methods                                                                                                                   |
| Were <b>human clinical and genomic datasets</b> deposited in a public access-controlled repository in accordance to ethical obligations to the patients and to the applicable consent agreement?  | Not Applicable                          |                                                                                                                                         |
| Are <b>computational models</b> that are central and integral to a study available without restrictions in a machine-readable form? Were the relevant accession numbers or links provided?        | Not Applicable                          |                                                                                                                                         |
| If publicly available data were reused, provide the respective <b>data citations</b> in the reference list.                                                                                       | Not Applicable                          |                                                                                                                                         |
